# Supplementary material for: Water vapour exchange between the atmospheric boundary layer and free troposphere over eastern China: seasonal characteristics and the El Niño–Southern Oscillation anomaly
Source: Copernicus journal article supplement (doi:10.5194/acp-24-259-2024), 2024-01-10
Supplement: Supplementary file 1 [file acp-24-259-2024-supplement.pdf]

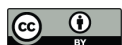

*Supplement of*

## **Water vapour exchange between the atmospheric boundary layer and free troposphere over eastern China: seasonal characteristics and the El Niño–Southern Oscillation anomaly**

**Xipeng Jin et al.**

*Correspondence to:* Xuhui Cai (xhcai@pku.edu.cn)

The copyright of individual parts of the supplement might differ from the article licence.

1 Table S1. Statistics of model performance of different parameterization schemes for the hourly  
 2 evolution of near-surface and vertical structure of specific humidity (Q), temperature (T), wind  
 3 speed (WS), as well as atmospheric boundary layer height (ABLH) and precipitation (Preci) at  
 4 Dezhou site (37.27°N, 116.72°E) during the winter sounding experiment (from December 26,  
 5 2017, to January 24, 2018).

|                            |          | WSM6+GD |       |      | Lin+GD |       |      | WSM6+KF |       |      | Lin+KF |       |      |
|----------------------------|----------|---------|-------|------|--------|-------|------|---------|-------|------|--------|-------|------|
|                            |          | R       | MB    | RMSE | R      | MB    | RMSE | R       | MB    | RMSE | R      | MB    | RMSE |
| Q<br>(g kg <sup>-1</sup> ) | surface  | 0.73    | -0.19 | 0.59 | 0.69   | -0.23 | 0.62 | 0.73    | -0.19 | 0.6  | 0.71   | -0.23 | 0.61 |
|                            | vertical | 0.61    | 0.04  | 0.43 | 0.58   | 0.03  | 0.43 | 0.59    | 0.03  | 0.43 | 0.58   | -0.04 | 0.44 |
| T<br>(K)                   | surface  | 0.9     | -1.45 | 2.7  | 0.89   | -1.61 | 2.85 | 0.89    | -1.44 | 2.73 | 0.88   | -2.81 | 3.56 |
|                            | vertical | 0.97    | -1.43 | 2.31 | 0.97   | -1.39 | 2.3  | 0.97    | -1.43 | 2.32 | 0.97   | -1.98 | 2.55 |
| WS<br>(m s <sup>-1</sup> ) | surface  | 0.55    | 2.14  | 2.71 | 0.56   | 2.14  | 2.68 | 0.55    | 2.14  | 2.71 | 0.51   | 1.97  | 2.56 |
|                            | vertical | 0.52    | 0.72  | 3.44 | 0.52   | 0.70  | 3.43 | 0.51    | 0.74  | 3.46 | 0.51   | 0.69  | 3.47 |
| ABLH (m)                   |          | 0.71    | -72   | 247  | 0.69   | -81   | 259  | 0.71    | -64   | 281  | 0.62   | -137  | 299  |
| Preci (mm/day)             |          | 0.99    | 0.01  | 0.05 | 0.68   | 0.05  | 0.16 | 0.89    | 0.01  | 0.06 | 0.78   | 0.03  | 0.12 |

Note. The temporal resolutions of sounding data and near-surface data are 3-hr and 1-hr, respectively, except for daily accumulated precipitation.

6 Table S2. Statistics of model performance of different parameterization schemes for the hourly  
7 evolution of near-surface and vertical structure of specific humidity (Q), temperature (T), wind  
8 speed (WS), as well as atmospheric boundary layer height (ABLH) and precipitation (Preci) at  
9 Dezhou site (37.27°N, 116.72°E) during the summer sounding experiment (from May 15 to  
10 June 14, 2018).

|                            |          | WSM6+GD |       |      | Lin+GD |       |      | WSM6+KF |       |      | Lin+KF |       |      |
|----------------------------|----------|---------|-------|------|--------|-------|------|---------|-------|------|--------|-------|------|
|                            |          | R       | MB    | RMSE | R      | MB    | RMSE | R       | MB    | RMSE | R      | MB    | RMSE |
| Q<br>(g kg <sup>-1</sup> ) | surface  | 0.81    | -2.05 | 3.05 | 0.79   | -2.16 | 3.22 | 0.81    | -2.02 | 3.06 | 0.8    | -2.13 | 3.16 |
|                            | vertical | 0.69    | -0.29 | 2.18 | 0.67   | -0.34 | 2.2  | 0.68    | -0.32 | 2.18 | 0.67   | -0.31 | 2.19 |
| T<br>(K)                   | surface  | 0.87    | 1.50  | 3.11 | 0.86   | 1.61  | 3.21 | 0.85    | 1.54  | 3.17 | 0.85   | 1.55  | 3.19 |
|                            | vertical | 0.95    | 1.89  | 2.83 | 0.91   | 1.94  | 3.23 | 0.93    | 2.21  | 3.15 | 0.91   | 2.29  | 3.56 |
| WS<br>(m s <sup>-1</sup> ) | surface  | 0.58    | 2.44  | 2.97 | 0.56   | 2.48  | 2.93 | 0.56    | 2.51  | 3.01 | 0.52   | 2.59  | 3.11 |
|                            | vertical | 0.54    | 1.10  | 3.21 | 0.53   | 1.16  | 3.34 | 0.52    | 1.10  | 3.4  | 0.5    | 1.21  | 3.57 |
| ABLH (m)                   |          | 0.84    | 121   | 343  | 0.79   | 146   | 379  | 0.82    | 132   | 379  | 0.8    | 139   | 387  |
| Preci (mm/day)             |          | 0.91    | -0.59 | 2.79 | 0.83   | -0.93 | 3.77 | 0.87    | -0.76 | 3.11 | 0.85   | -0.88 | 3.35 |

Note. The temporal resolutions of sounding data and near-surface data are 3-hr and 1-hr, respectively, except for daily accumulated precipitation.

11 Table S3. Statistics of mean, standard deviation, and Kolmogorov-Smirnov test significance for  
 12 the key meteorological elements at near-surface and 700 hPa over 30 years of historical data  
 13 (1990-2019) and 7 years of the sampling period (2011&2014-2019).

| Variables       | 30-year<br>mean±adv     | 7-year<br>mean±adv | K-S Sig.<br>(p<0.05) |       |
|-----------------|-------------------------|--------------------|----------------------|-------|
| ABLH (m)        | 469.7±91.9              | 470.3±90.1         | 1.000                |       |
| Preci (mm)      | 3.55±2.01               | 3.36±1.83          | 0.938                |       |
| Near<br>surface | U (m s <sup>-1</sup> )  | -0.29±0.28         | -0.30±0.28           | 0.890 |
|                 | V (m s <sup>-1</sup> )  | -0.07±0.66         | -0.10±0.65           | 0.999 |
|                 | T (K)                   | 287.8±8.2          | 288.0±8.2            | 0.983 |
| 700hPa          | U (m s <sup>-1</sup> )  | 4.84±2.05          | 4.72±2.01            | 0.991 |
|                 | V (m s <sup>-1</sup> )  | 0.60±1.28          | 0.59±1.13            | 0.882 |
|                 | W (Pa s <sup>-1</sup> ) | -0.006±0.019       | -0.005±0.017         | 0.993 |
|                 | Q (g kg <sup>-1</sup> ) | 4.79±2.06          | 4.87±2.14            | 0.986 |
|                 | T (K)                   | 276.6±5.6          | 276.8±5.7            | 0.995 |

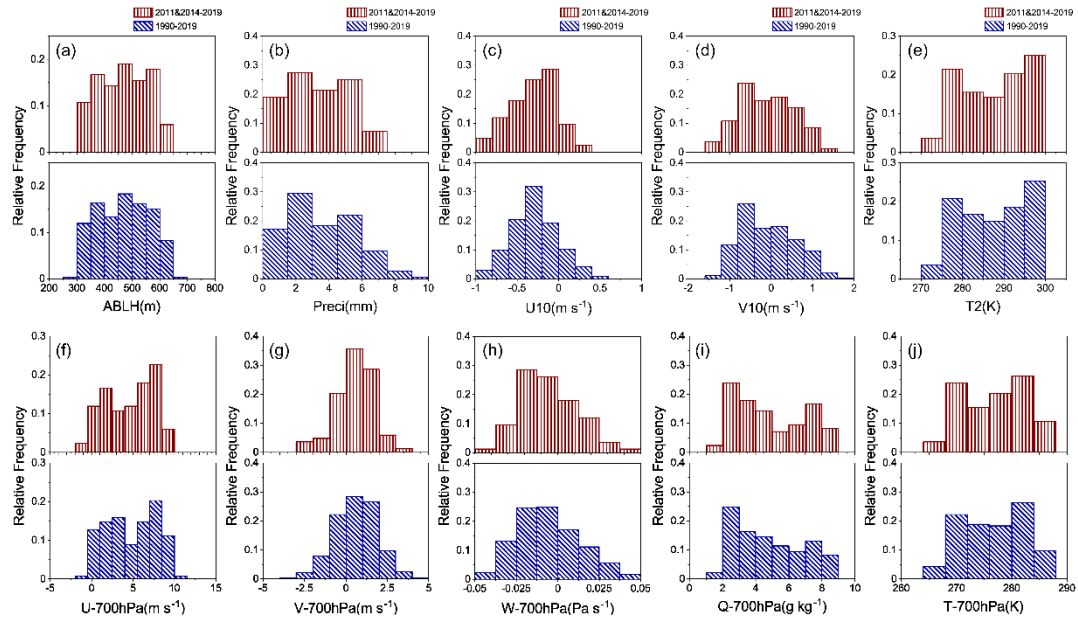

14

15

16 Figure S1. Histogram of the (a) boundary layer height, (b) precipitation, (c-d) 10 m horizontal  
 17 winds, (e) 2 m temperature, as well as (f-h) three-dimension wind component, (i) specific  
 18 humidity, (j) temperature at 700 hPa during 7 years sample (2011&2014-2019, filled with  
 19 brown vertical lines) and 30-year climatology (1990-2019, filled with blue oblique lines).

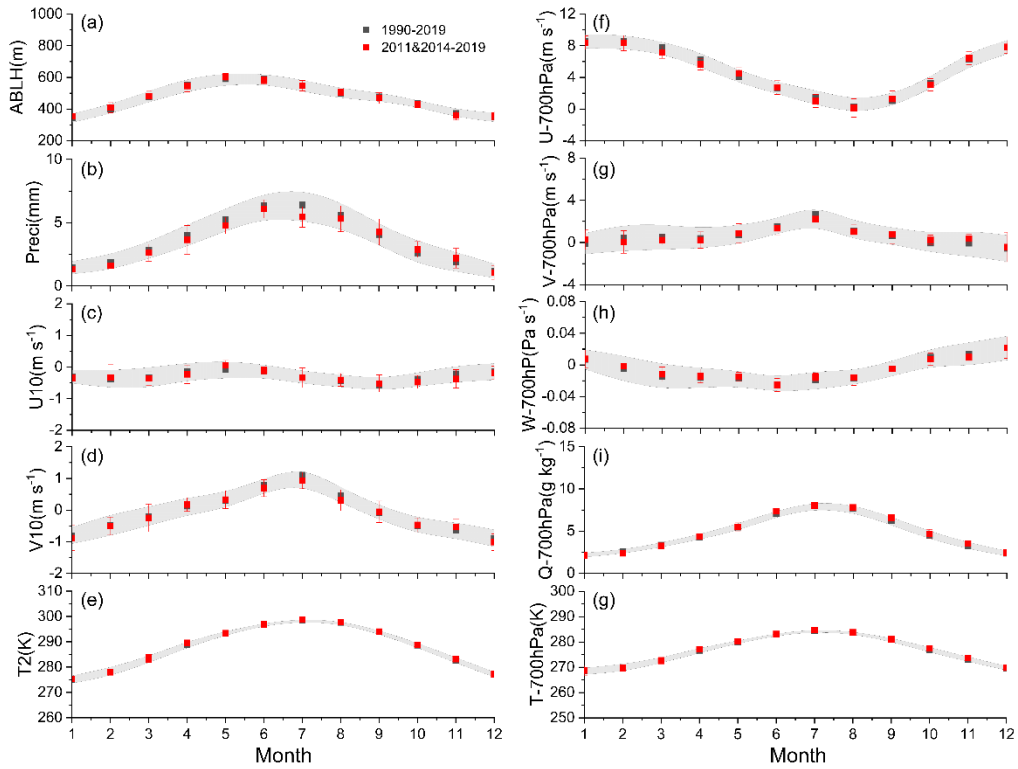

20

21

22 Figure S2. Annual variation of the monthly average with standard deviation for (a) boundary  
 23 layer height, (b) precipitation, (c-d) 10 m horizontal winds, (e) 2 m temperature, as well as (f-  
 24 h) three-dimension wind component, (i) specific humidity, (j) temperature at 700 hPa during 7-  
 25 year sample (2011&2014-2019, red square with line) and 30-year climatology (1990-2019,  
 26 black square with grey-shaded area).

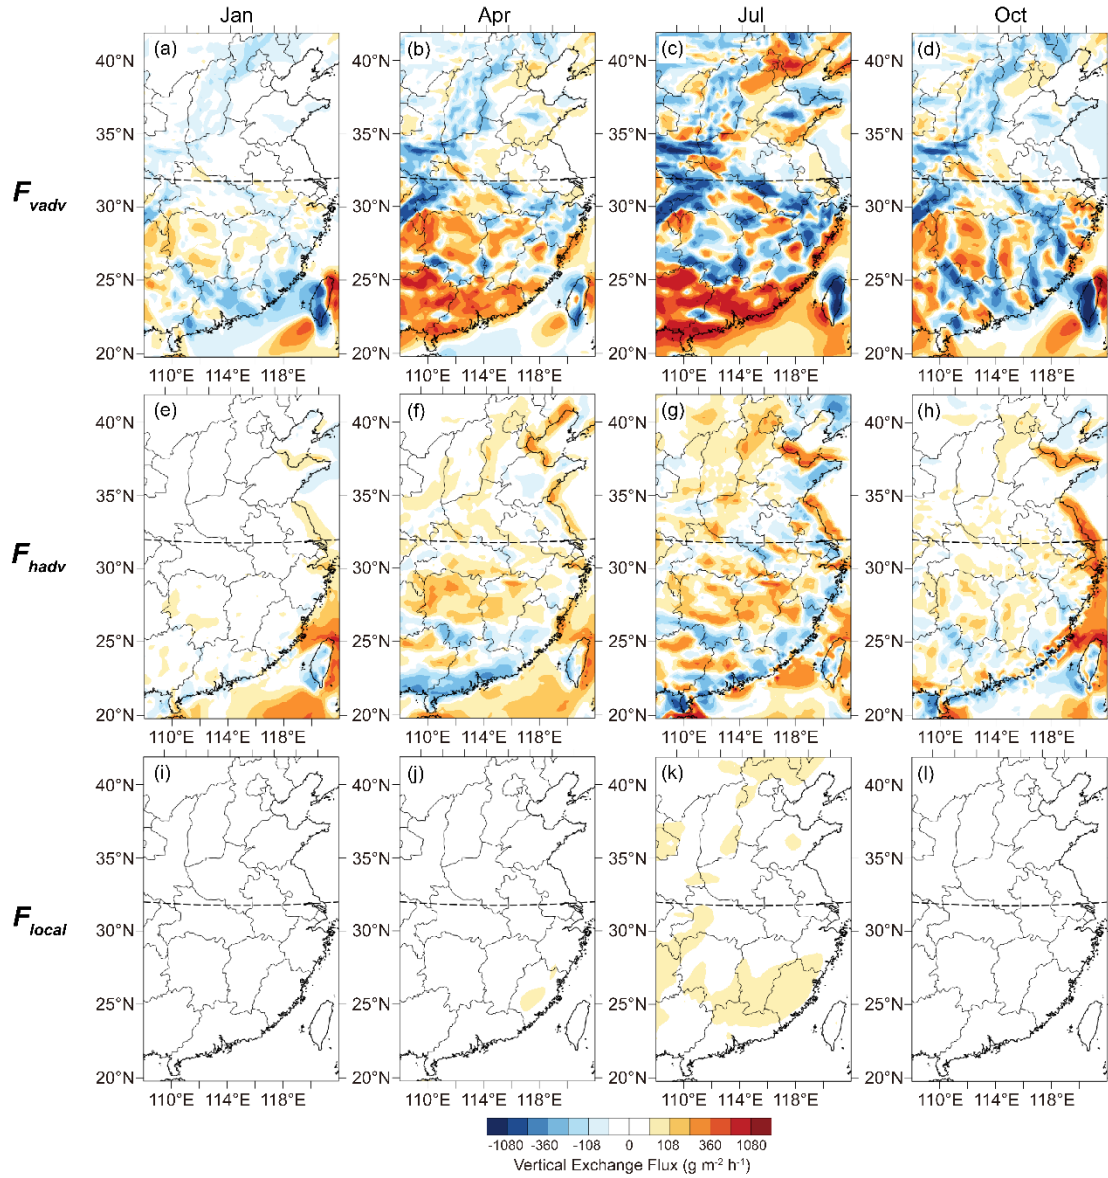

27 Figure S3. Spatial distribution of three average flux components of ABL-FT water vapour  
 28 exchange ( $F_{vadv}$ , a-d;  $F_{hadv}$ , e-h;  $F_{local}$ , i-l) averaged over 7 years for January, April, July,  
 29 and October. Positive and negative fluxes (warm and cool colours) represent water vapour  
 30 upward and downward transport at the ABL and FT interface. Black dashed lines mark the  
 31 boundary between the northern (32-42°N, 108-122°E) and southern (20-32°N, 108-122°E)  
 32 regions.

34

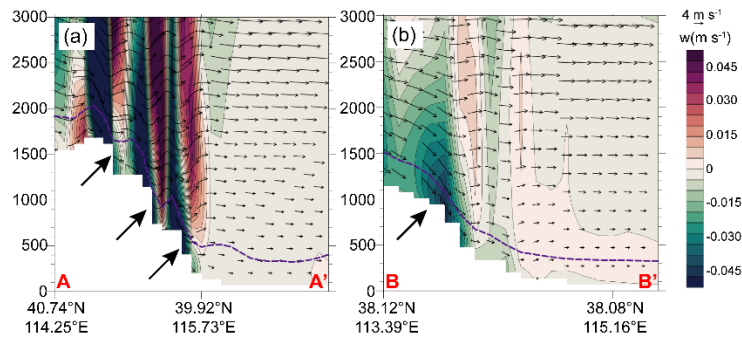

35

36 Figure S4. The height cross-sections of vertical velocity superimposed with u-w wind vectors  
37 (w multiplied by 100) averaged over 7 years for January. Cross sections extracted from (AA':  
38 41.21°N, 115.15°E) to (39.09°N, 117.20°E) and from (BB': 38.1°N, 113.45°E) to (38.1°N,  
39 115.47°E), respectively. The thin arrows, purple dashed lines and bold arrows indicate u-w wind  
40 vectors, ABL heights and steep/gentle slopes, respectively.

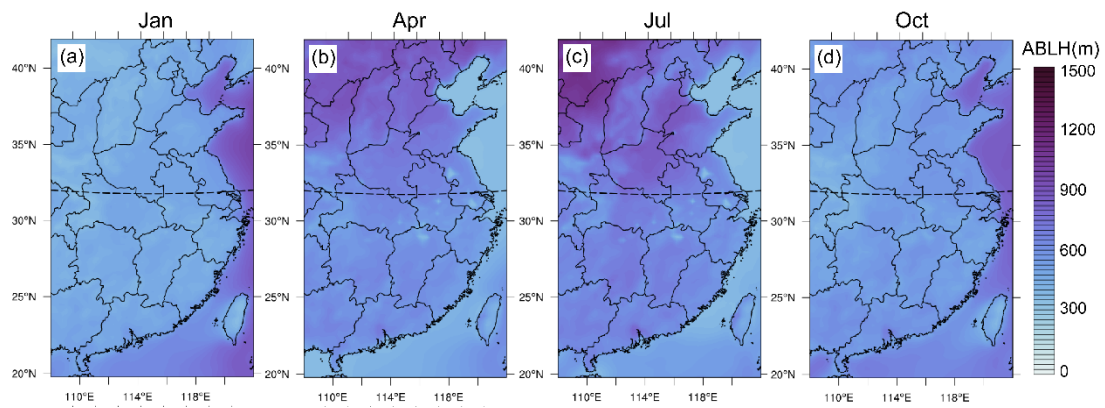

41

42

43 Figure S5. Spatial distribution of ABL height averaged over 7 years for (a) January, (b) April,  
44 (c) July, and (d) October. Black dashed lines mark the boundary between the northern (32-42°N,  
45 108-122°E) and southern (20-32°N, 108-122°E) regions.



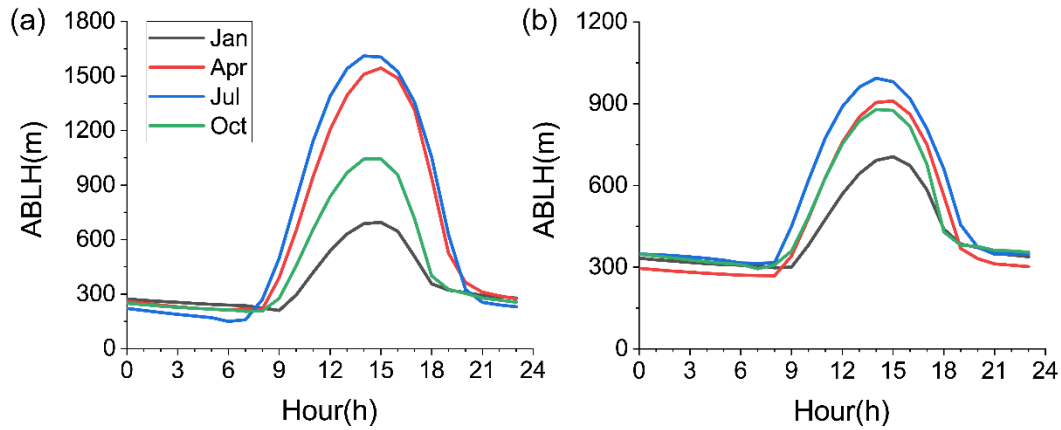

46 Figure S6. Daily cycle of ABL height over the (a) northern (32-42°N, 108-122°E) and  
 47 southern (20-32°N, 108-122°E) regions averaged over 7 years for January, April, July, and  
 48 October.

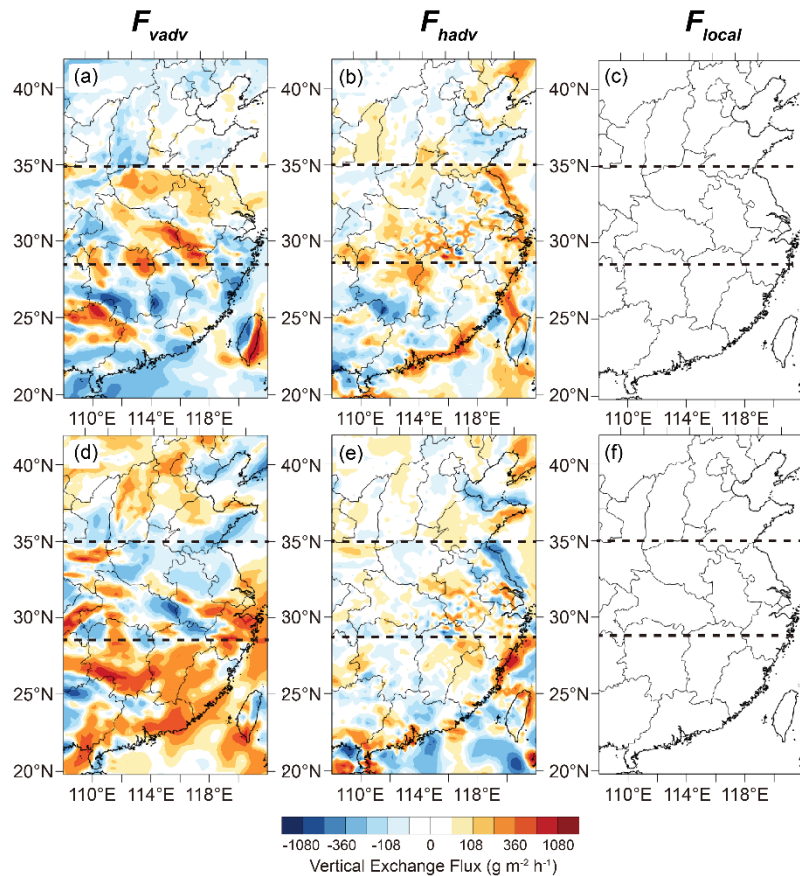

49  
 50 Figure S7. Spatial distribution of ABL-FT water vapour exchange flux anomalies for three  
 51 components ( $F_{vadv}$ ,  $F_{hadv}$ ,  $F_{local}$ ) in July of (a-c) 2016 (La Niña year) and (d-e) 2015 (El Niño  
 52 year).  $F_{vadv}$ : vertical motion through the ABL-FT interface;  $F_{hadv}$ : advection across the  
 53 spatial inclined ABL top;  $F_{local}$ : local temporal variation of ABL height. The black dashed  
 54 lines indicate the triple distribution from north to south.
